# Supplementary material for: Chagas vectors Panstrongylus chinai (Del Ponte, 1929) and Panstrongylus howardi (Neiva, 1911): chromatic forms or true species?
Source: Parasit Vectors. 2020 May 6;13:226. doi: 10.1186/s13071-020-04097-z (PMC7201598; doi:10.1186/s13071-020-04097-z)
Supplement: Supplementary file 2 — Additional file 2: Table S2. Genetic 2k-p distances among Panstrongylus chinai (26 individuals), P. howardi (33 individuals), P. megistus (2 individuals), P. tupynambai (2 individuals), P. lutzi (1 individual), Triatoma tibiamaculata (2 individuals), T. infestans (1 individual) and T. brasiliensis (1 individual). [file 13071_2020_4097_MOESM2_ESM.xls]

## Sheet: Table S2
Additional file 2: Table S2. Genetic 2k-p distances among Panstrongylus chinai (26 individuals), P. howardi (33 individuals), P. megistus (2 individuals), P. tupynambai (2 individuals), P. lutzi (1 individual), Triatoma tibiamaculata (2 individuals), T. infestans (1 individual) and T. brasiliensis (1 individual).
Distance Matrix
Using the Kimura correction method
Using base positions 123 in the codon
Gap weighting is 0.000000
	1	2	3	4	5	6	7	8	9	10	11	12	13	14	15	16	17	18	19	20	21	22	23	24	25	26	27	28	29	30	31	32	33	34	35	36	37	38	39	40	41	42	43	44	45	46	47	48	49
AY062165.1_T.infestans 1	0.00	15.10	20.07	17.16	17.47	17.09	18.94	23.31	24.00	21.85	21.83	21.83	21.83	21.83	21.83	21.83	21.83	22.30	22.30	22.07	22.07	22.07	22.07	22.07	22.07	21.59	21.83	21.83	21.83	21.83	21.83	21.83	21.83	21.83	21.83	20.94	21.14	21.41	21.41	21.18	20.94	20.71	20.71	21.18	20.71	20.94	20.94	20.94	20.94
AY336524_T.brasiliensis 2		0.00	22.78	24.04	23.73	22.34	23.23	21.08	21.68	23.48	24.04	24.04	24.04	24.04	24.04	24.04	24.04	24.63	24.63	24.33	24.33	24.33	24.63	24.63	24.63	24.04	24.33	24.33	24.33	24.33	24.33	24.33	24.33	24.33	24.33	23.19	24.01	24.07	24.07	23.77	23.48	23.19	23.19	23.77	23.48	23.48	23.48	23.48	23.48
Panstrongylus_lutzi_KC249262 3			0.00	18.04	18.33	19.12	20.26	18.51	18.51	21.08	21.40	21.40	21.40	21.40	21.40	21.40	21.40	21.10	21.10	21.40	21.40	20.81	21.10	21.10	21.10	20.51	20.81	20.81	20.81	20.81	20.81	20.81	20.81	20.81	20.81	18.23	19.04	18.80	18.80	18.51	18.23	18.23	18.23	18.80	18.51	18.51	18.51	18.51	18.51
Triatoma_tibiamaculata_KC249296 4				0.00	1.07	16.49	19.04	22.92	22.00	21.52	20.96	20.96	20.96	20.96	20.96	20.96	20.96	21.54	21.54	21.25	21.25	20.67	20.96	20.96	20.96	20.96	20.67	20.67	20.67	20.67	20.67	20.67	20.67	20.67	20.67	18.71	19.53	18.71	18.71	19.00	19.00	19.28	19.28	19.28	19.00	19.00	19.00	19.00	19.00
Triatoma_tibiamaculata_KC249297 5					0.00	16.77	18.74	22.61	23.54	21.82	21.25	21.25	21.25	21.25	21.25	21.25	21.25	21.84	21.84	21.54	21.54	20.96	21.25	21.25	21.25	21.25	20.96	20.96	20.96	20.96	20.96	20.96	20.96	20.96	20.96	19.56	20.39	19.56	19.56	19.85	19.85	20.14	20.14	20.14	19.85	19.85	19.85	19.85	19.85
Panstrongylus_megistus_KC249231 6						0.00	2.38	21.00	21.30	19.04	19.06	19.06	19.06	19.06	19.06	19.06	19.06	19.64	19.64	19.35	19.35	18.78	19.06	19.06	19.06	18.49	18.78	18.78	18.78	18.78	18.78	18.78	18.78	18.78	18.78	18.48	19.29	19.04	19.04	18.76	18.76	19.04	19.04	19.04	18.76	18.76	18.76	18.76	18.76
Panstrongylus_megistus_KC249230 7							0.00	19.48	20.37	21.40	21.43	21.43	21.43	21.43	21.43	21.43	21.43	22.03	22.03	21.73	21.73	21.13	21.43	21.43	21.43	20.83	21.13	21.13	21.13	21.13	21.13	21.13	21.13	21.13	21.13	20.22	20.76	20.51	20.51	20.22	20.22	20.51	20.51	20.51	20.22	20.22	20.22	20.22	20.22
Panstrongylus_tupynambai_KC249234 8								0.00	1.94	22.53	22.56	22.56	22.56	22.56	22.56	22.56	22.56	22.56	22.56	22.86	22.86	22.86	22.56	23.17	23.17	23.17	22.86	22.86	22.86	22.86	22.86	22.86	22.86	22.86	22.86	21.38	22.23	21.38	21.38	21.68	21.68	21.38	21.38	21.98	21.68	21.68	21.68	21.68	21.68
Panstrongylus_tupynambai_KC249233 9									0.00	23.45	23.48	23.48	23.48	23.48	23.48	23.48	23.48	23.48	23.48	23.79	23.79	23.79	23.48	24.11	24.11	24.11	23.79	23.79	23.79	23.79	23.79	23.79	23.79	23.79	23.79	20.78	21.63	20.78	20.78	21.08	21.08	20.78	20.78	21.38	21.08	21.08	21.08	21.08	21.08
JX400979.1_P.chinai_SF2686_Cytb 10										0.00	0.94	0.94	0.94	0.94	0.94	0.94	0.94	0.94	0.94	0.79	0.79	0.63	0.63	0.63	0.63	0.63	0.47	0.47	0.47	0.47	0.47	0.47	0.47	0.47	0.47	7.84	8.36	7.84	7.84	8.02	7.66	8.02	8.02	8.02	8.02	7.84	7.84	7.84	7.84
JX400975.1_P.chinai_ND2701_Cytb 11											0.00	-0.00	-0.00	-0.00	-0.00	-0.00	-0.00	0.31	0.31	0.16	0.16	0.63	0.63	0.63	0.63	0.63	0.47	0.47	0.47	0.47	0.47	0.47	0.47	0.47	0.47	7.49	8.01	7.49	7.49	7.67	7.31	7.67	7.67	7.67	7.67	7.49	7.49	7.49	7.49
JX400974.1_P.chinai_ND1730_Cytb 12												0.00	-0.00	-0.00	-0.00	-0.00	-0.00	0.31	0.31	0.16	0.16	0.63	0.63	0.63	0.63	0.63	0.47	0.47	0.47	0.47	0.47	0.47	0.47	0.47	0.47	7.49	8.01	7.49	7.49	7.67	7.31	7.67	7.67	7.67	7.67	7.49	7.49	7.49	7.49
JX400944.1_P.chinai_BR2260_Cytb 13													0.00	-0.00	-0.00	-0.00	-0.00	0.31	0.31	0.16	0.16	0.63	0.63	0.63	0.63	0.63	0.47	0.47	0.47	0.47	0.47	0.47	0.47	0.47	0.47	7.49	8.01	7.49	7.49	7.67	7.31	7.67	7.67	7.67	7.67	7.49	7.49	7.49	7.49
JX400943.1_P.chinai_BR2254_Cytb 14														0.00	-0.00	-0.00	-0.00	0.31	0.31	0.16	0.16	0.63	0.63	0.63	0.63	0.63	0.47	0.47	0.47	0.47	0.47	0.47	0.47	0.47	0.47	7.49	8.01	7.49	7.49	7.67	7.31	7.67	7.67	7.67	7.67	7.49	7.49	7.49	7.49
JX400942.1_P.chinai_BR2253_Cytb 15															0.00	-0.00	-0.00	0.31	0.31	0.16	0.16	0.63	0.63	0.63	0.63	0.63	0.47	0.47	0.47	0.47	0.47	0.47	0.47	0.47	0.47	7.49	8.01	7.49	7.49	7.67	7.31	7.67	7.67	7.67	7.67	7.49	7.49	7.49	7.49
JX400935.1_P.chinai_AH2445_Cytb 16																0.00	-0.00	0.31	0.31	0.16	0.16	0.63	0.63	0.63	0.63	0.63	0.47	0.47	0.47	0.47	0.47	0.47	0.47	0.47	0.47	7.49	8.01	7.49	7.49	7.67	7.31	7.67	7.67	7.67	7.67	7.49	7.49	7.49	7.49
JX400933.1_P.chinai_AH2408_Cytb 17																	0.00	0.31	0.31	0.16	0.16	0.63	0.63	0.63	0.63	0.63	0.47	0.47	0.47	0.47	0.47	0.47	0.47	0.47	0.47	7.49	8.01	7.49	7.49	7.67	7.31	7.67	7.67	7.67	7.67	7.49	7.49	7.49	7.49
JX400967.1_P.chinai_HW4821_Cytb 18																		0.00	-0.00	0.16	0.16	0.63	0.63	0.63	0.63	0.63	0.47	0.47	0.47	0.47	0.47	0.47	0.47	0.47	0.47	7.85	8.37	7.85	7.85	8.03	7.67	8.03	8.03	8.03	8.03	7.85	7.85	7.85	7.85
JX400966.1_P.chinai_HW4820_Cytb 19																			0.00	0.16	0.16	0.63	0.63	0.63	0.63	0.63	0.47	0.47	0.47	0.47	0.47	0.47	0.47	0.47	0.47	7.85	8.37	7.85	7.85	8.03	7.67	8.03	8.03	8.03	8.03	7.85	7.85	7.85	7.85
JX400971.1_P.chinai_LU4874_Cytb 20																				0.00	-0.00	0.47	0.47	0.47	0.47	0.47	0.31	0.31	0.31	0.31	0.31	0.31	0.31	0.31	0.31	7.67	8.19	7.67	7.67	7.85	7.49	7.85	7.85	7.85	7.85	7.67	7.67	7.67	7.67
JX400934.1_P.chinai_AH2421_Cytb 21																					0.00	0.47	0.47	0.47	0.47	0.47	0.31	0.31	0.31	0.31	0.31	0.31	0.31	0.31	0.31	7.67	8.19	7.67	7.67	7.85	7.49	7.85	7.85	7.85	7.85	7.67	7.67	7.67	7.67
JX400962.1_P.chinai_EX4585_Cytb 22																						0.00	0.31	0.31	0.31	0.31	0.16	0.16	0.16	0.16	0.16	0.16	0.16	0.16	0.16	8.21	8.73	8.21	8.21	8.39	8.03	8.39	8.39	8.39	8.39	8.21	8.21	8.21	8.21
JX400960.1_P.chinai_EX2668_Cytb 23																							0.00	0.31	0.31	0.31	0.16	0.16	0.16	0.16	0.16	0.16	0.16	0.16	0.16	8.21	8.73	8.21	8.21	8.39	8.03	8.39	8.39	8.39	8.39	8.21	8.21	8.21	8.21
JX400955.1_P.chinai_CQ4350_Cytb 24																								0.00	-0.00	0.31	0.16	0.16	0.16	0.16	0.16	0.16	0.16	0.16	0.16	8.21	8.73	8.21	8.21	8.39	8.03	8.39	8.39	8.39	8.39	8.21	8.21	8.21	8.21
JX400954.1_P.chinai_CQ4349_Cytb 25																									0.00	0.31	0.16	0.16	0.16	0.16	0.16	0.16	0.16	0.16	0.16	8.21	8.73	8.21	8.21	8.39	8.03	8.39	8.39	8.39	8.39	8.21	8.21	8.21	8.21
JX400945.1_P.chinai_CE4586_Cytb 26																										0.00	0.16	0.16	0.16	0.16	0.16	0.16	0.16	0.16	0.16	7.85	8.37	8.21	8.21	8.03	7.67	8.03	8.03	8.03	8.03	7.85	7.85	7.85	7.85
JX400983.1_P.chinai_ST4584_Cytb 27																											0.00	-0.00	-0.00	-0.00	-0.00	-0.00	-0.00	-0.00	-0.00	8.03	8.55	8.03	8.03	8.21	7.85	8.21	8.21	8.21	8.21	8.03	8.03	8.03	8.03
JX400982.1_P.chinai_ST3013_Cytb 28																												0.00	-0.00	-0.00	-0.00	-0.00	-0.00	-0.00	-0.00	8.03	8.55	8.03	8.03	8.21	7.85	8.21	8.21	8.21	8.21	8.03	8.03	8.03	8.03
JX400965.1_P.chinai_GA4355_Cytb 29																													0.00	-0.00	-0.00	-0.00	-0.00	-0.00	-0.00	8.03	8.55	8.03	8.03	8.21	7.85	8.21	8.21	8.21	8.21	8.03	8.03	8.03	8.03
JX400964.1_P.chinai_GA4354_Cytb 30																														0.00	-0.00	-0.00	-0.00	-0.00	-0.00	8.03	8.55	8.03	8.03	8.21	7.85	8.21	8.21	8.21	8.21	8.03	8.03	8.03	8.03
JX400961.1_P.chinai_EX2692_Cytb 31																															0.00	-0.00	-0.00	-0.00	-0.00	8.03	8.55	8.03	8.03	8.21	7.85	8.21	8.21	8.21	8.21	8.03	8.03	8.03	8.03
JX400959.1_P.chinai_CY3087_Cytb 32																																0.00	-0.00	-0.00	-0.00	8.03	8.55	8.03	8.03	8.21	7.85	8.21	8.21	8.21	8.21	8.03	8.03	8.03	8.03
JX400958.1_P.chinai_CY3008_Cytb 33																																	0.00	-0.00	-0.00	8.03	8.55	8.03	8.03	8.21	7.85	8.21	8.21	8.21	8.21	8.03	8.03	8.03	8.03
JX400957.1_P.chinai_CY3007_Cytb 34																																		0.00	-0.00	8.03	8.55	8.03	8.03	8.21	7.85	8.21	8.21	8.21	8.21	8.03	8.03	8.03	8.03
JX400956.1_P.chinai_CQ4426_Cytb 35																																			0.00	8.03	8.55	8.03	8.03	8.21	7.85	8.21	8.21	8.21	8.21	8.03	8.03	8.03	8.03
JX400999.1_P.howardi_ZL2782_Cytb 36																																				0.00	0.78	0.63	0.63	0.47	0.47	0.47	0.47	0.47	0.47	0.31	0.31	0.31	0.31
JX400984.1_P.howardi_TBJ1528_Cytb 37																																					0.00	0.78	0.78	0.63	0.63	0.63	0.63	0.63	0.31	0.47	0.47	0.47	0.47
JX401000.1_P.howardi_ZL2788_Cytb 38																																						0.00	-0.00	0.16	0.47	0.47	0.47	0.47	0.47	0.31	0.31	0.31	0.31
JX400998.1_P.howardi_ZL2781_Cytb 39																																							0.00	0.16	0.47	0.47	0.47	0.47	0.47	0.31	0.31	0.31	0.31
JX400938.1_P.howardi_BJ2771_Cytb 40																																								0.00	0.31	0.31	0.31	0.31	0.31	0.16	0.16	0.16	0.16
JX400997.1_P.howardi_ZL2778_Cytb 41																																									0.00	0.31	0.31	0.31	0.31	0.16	0.16	0.16	0.16
JX400981.1_P.howardi_SG1348_Cytb 42																																										0.00	-0.00	0.31	0.31	0.16	0.16	0.16	0.16
JX400980.1_P.howardi_SG1346_Cytb 43																																											0.00	0.31	0.31	0.16	0.16	0.16	0.16
JX400973.1_P.howardi_MB2961_Cytb 44																																												0.00	0.31	0.16	0.16	0.16	0.16
JX400939.1_P.howardi_BJ2997_Cytb 45																																													0.00	0.16	0.16	0.16	0.16
JX401001.1_P.howardi_ZL2790_Cytb 46																																														0.00	-0.00	-0.00	-0.00
JX400996.1_P.howardi_TSW2317_Cytb 47																																															0.00	-0.00	-0.00
JX400988.1_P.howardi_TBJ1691_Cytb 48																																																0.00	-0.00
JX400987.1_P.howardi_TBJ1621_Cytb 49																																																	0.00
JX400986.1_P.howardi_TBJ1608_Cytb 50
JX400985.1_P.howardi_TBJ1558_Cytb 51
JX400972.1_P.howardi_MB2958_Cytb 52
JX400970.1_P.howardi_LE3349_Cytb 53
JX400969.1_P.howardi_LE3346_Cytb 54
JX400968.1_P.howardi_LE2951_Cytb 55
JX400953.1_P.howardi_CN3558_Cytb 56
JX400952.1_P.howardi_CN3519_Cytb 57
JX400951.1_P.howardi_CN1725_Cytb 58
JX400950.1_P.howardi_CN1360_Cytb 59
JX400949.1_P.howardi_CN1352_Cytb 60
JX400948.1_P.howardi_CN1351_Cytb 61
JX400947.1_P.howardi_CN1350_Cytb 62
JX400946.1_P.howardi_CN1349_Cytb 63
JX400941.1_P.howardi_BJ5612_Cytb 64
JX400937.1_P.howardi_BJ2745_Cytb 65
JX400936.1_P.howardi_BJ2737_Cytb 66
JX400994.1_P.howardi_TKE2387_Cytb 67
JX400940.1_P.howardi_BJ2998_Cytb 68
[truncated: 20 more columns]
